# Supplementary material for: Exploring the origin of chirality in Ag 8 clusters based on modular disassembly
Source: Royal Society of Chemistry journal article supplement (doi:10.1039/d5cc06965c), 2025-12-23
Supplement: d5cc06965c1.pdf [file d5cc06965c1.pdf]

Supplementary Information (SI) for ChemComm.  
This journal is © The Royal Society of Chemistry 2025

## Supporting Information

### Exploring the origin of chirality in $\text{Ag}_8$ clusters based on modular disassembly

Jingbin Hao,<sup>a,‡</sup> Shenao Wu,<sup>a,‡</sup> Jiayun Cao,<sup>a</sup> Qinzhen Li,<sup>a</sup> Jinsong Chai,<sup>a</sup> Guiqi  
Gao,<sup>a,\*</sup> Lin Xiong,<sup>b,\*</sup> Sha Yang<sup>a,\*</sup> and Manzhou Zhu

<sup>a</sup> School of Materials Science and Engineering and Centre for Atomic Engineering of Advanced Materials, Key Laboratory of Structure and Functional Regulation of Hybrid Materials of Ministry of Education, Anhui Province Key Laboratory of Chemistry for Inorganic/Organic Hybrid Functionalized Materials, Anhui University, Hefei, Anhui 230601, China.

<sup>b</sup> School of Food and Chemical Engineering, Shaoyang University, Shaoyang 422000, P.R. China

<sup>‡</sup> These authors contributed equally to this work.

## 1. Chemicals

All reagents were commercially available and used without further purification. The solvents employed in this study included dichloromethane (DCM), methanol (MeOH), ethanol (EtOH), and acetonitrile (MeCN), all of which were of HPLC grade and purchased from Sinopharm Chemical Reagent Co., Ltd. Sodium borohydride ( $\text{NaBH}_4$ ,  $\geq 98\%$ ) were obtained from Shanghai Aladdin Biochemical Technology Co., Ltd. Silver p-toluenesulfonate ( $\text{C}_7\text{H}_7\text{AgO}_3\text{S}$ ,  $\geq 98\%$ , metal basis), (+)-fenchyl thiols ( $\text{C}_{10}\text{H}_{16}\text{O}$ ,  $\geq 98\%$ ), (-)-fenchyl thiols ( $\text{C}_{10}\text{H}_{16}\text{O}$ ,  $\geq 98\%$ ), Lawesson's reagent (LR,  $\geq 97\%$ ), and 1,1'-bis(diphenylphosphino)ferrocene ( $\text{C}_{34}\text{H}_{28}\text{FeP}_2$ ,  $\geq 97\%$ ) were purchased from Shanghai Macklin Biochemical Co.

## 2. Synthesis of R/S- $\text{Ag}_8$ clusters

Firstly, 60 mg of silver p-toluenesulfonate was added to 7 mL of methanol and ultrasonicated until completely dissolved. Then, 10 mL of dichloromethane was added. Subsequently, 50  $\mu\text{L}$  of (+/-)-fenchyl thiols was added under vigorous stirring. After 15 minutes, the solution became clear. Then, 30 mg of 1,1'-bis(diphenylphosphino)ferrocene was added, and the solution turned golden yellow. After 10 minutes, the solution became turbid. Next, 2 mL of freshly prepared  $\text{NaBH}_4$  solution (10  $\text{mg mL}^{-1}$  in EtOH) was added dropwise. The solution gradually turned black. After the reaction was carried out at room temperature for 17.5 hours, the product was washed several times with methanol and acetonitrile. After diffusing acetonitrile into the dichloromethane solution of the nanoclusters for 1 day, colorless block single crystals could be obtained. The yield of R/S- $\text{Ag}_8$  clusters was 19% based on the initial silver atom.

## 3. Measurement

The UV-vis absorption spectra of the nanoclusters were recorded using a METASH UV-9000 spectrometer with a 1 cm quartz cell and dichloromethane as the solvent. The spectra were obtained by electrospray ionization mass spectrometry (ESI-MS) using a Waters UPLC h-class/Xevo G2-XSQTOF mass spectrometer. Single crystal X-ray diffraction data were collected on a Stoe Stadivari diffractometer using graphite monochromated Cu  $K\alpha$  radiation ( $\lambda = 1.54184$ ). CD spectra were obtained using a JASCO J-1500 CD spectrometer.

## 4. Computational methods and details

The geometric optimizations and energy calculations for the  $\text{Ag}_4$  and  $\text{Ag}_8$  clusters were performed using the ORCA 5.0.3 program system,<sup>1-2</sup> at the PBE0-D3(BJ)/def2-SVP and PBE0-

D3(BJ)/def2-TZVP levels of theory,<sup>3-5</sup> respectively. TDDFT calculation is implemented using the ORCA software package at the level of PBE0/def2-SV(P).<sup>5-6</sup> In addition, the solvent effect was considered with 1, 2-dichloroethane in the SMD model.<sup>7</sup> The number of excited states calculated for each cluster is 300. In order to reflect the differences in the electronic structures of Ag<sub>4</sub> and Ag<sub>8</sub>, all the above calculations use the overall structure (without any simplification). In addition, the data processing of PDOS and UV-Vis is implemented based on the Multiwfn 3.8 (dev) software package.<sup>8-9</sup>

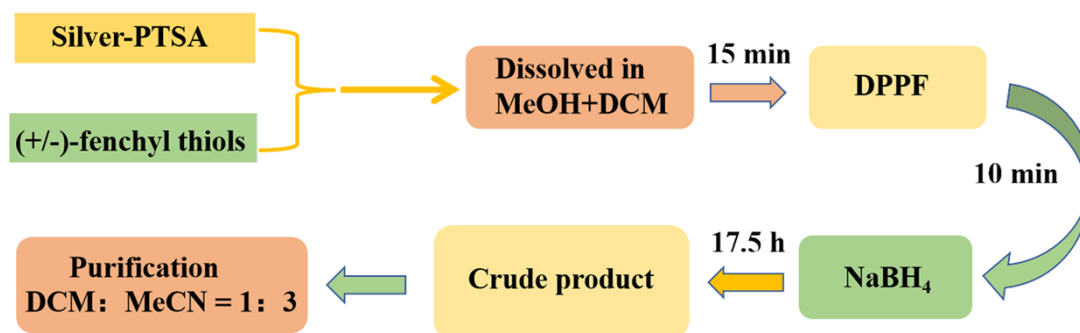

**Fig. S1** Synthesis flowchart of R/S-Ag<sub>8</sub> clusters.

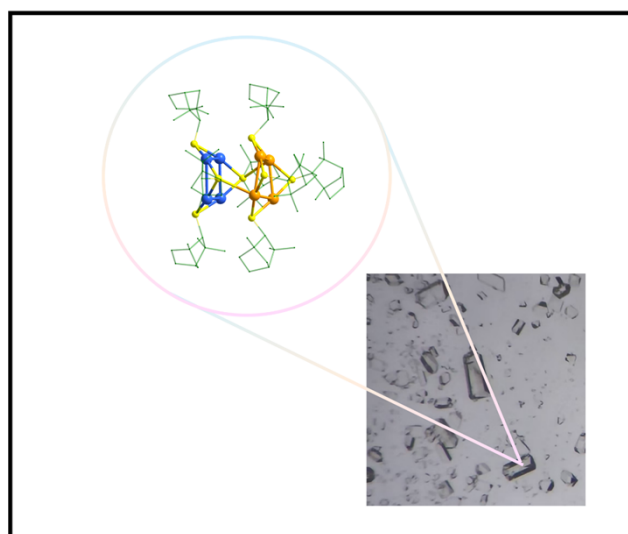

**Fig. S2** Crystal photos and structure of R-Ag<sub>8</sub> cluster.

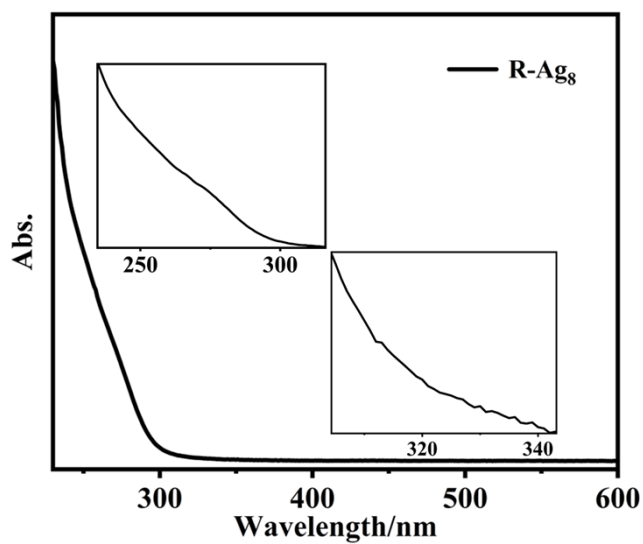

**Fig. S3** UV-vis of R-Ag<sub>8</sub> cluster.

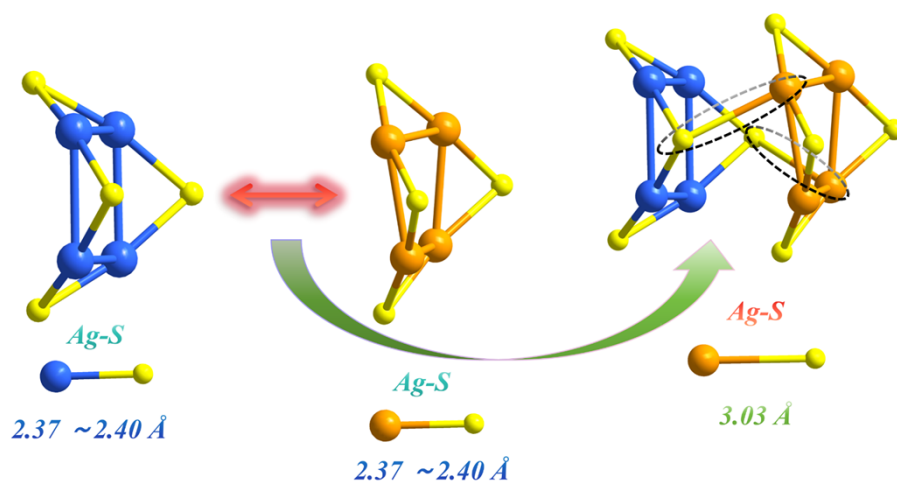

**Fig. S4** The bond length of the Ag-S bond in S-Ag<sub>8</sub> cluster.

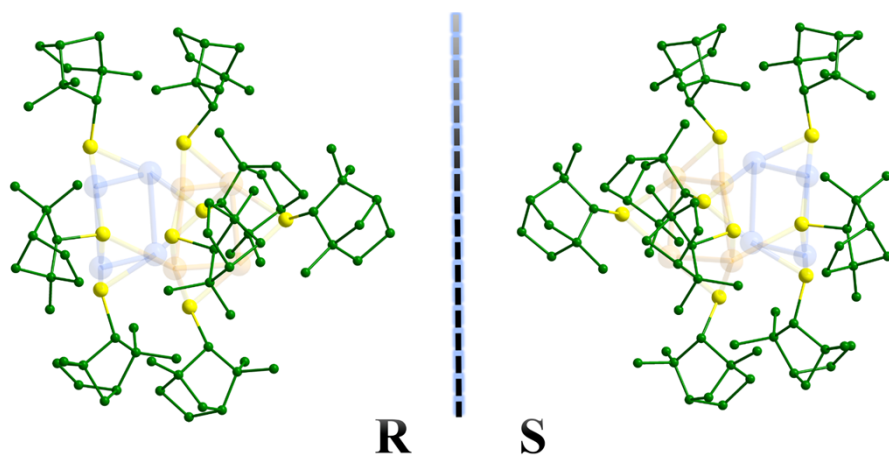

**Fig. S5** Structure of chiral ligands in R/S-Ag<sub>8</sub>.

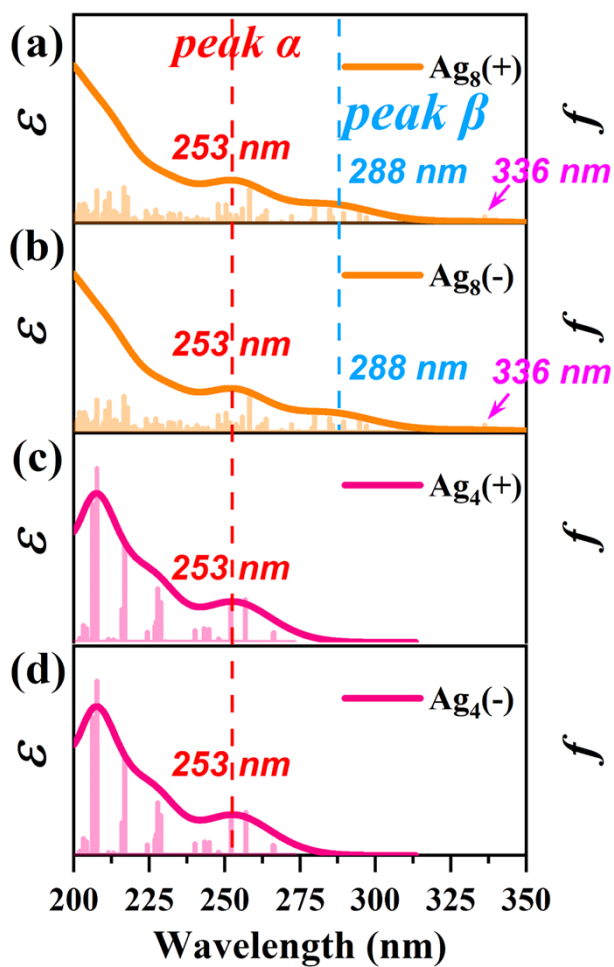

**Fig. S6** Calculated UV-Vis spectra of (a,b)  $\text{Ag}_8$  and (c,d)  $\text{Ag}_4$  clusters.

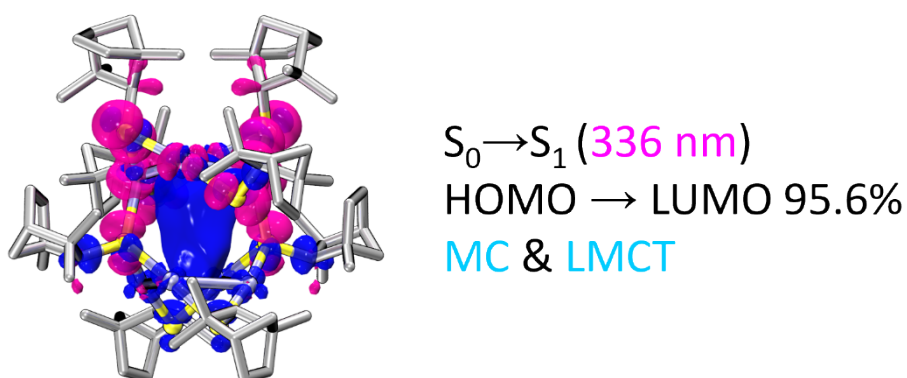

**Fig. S7** Hole and electron distributions of the first excited state ( $S_1$ ) in the R/S- $\text{Ag}_8$  clusters (Blue and pink isosurfaces represent electron and hole, with the value of isosurfaces set at 0.001).

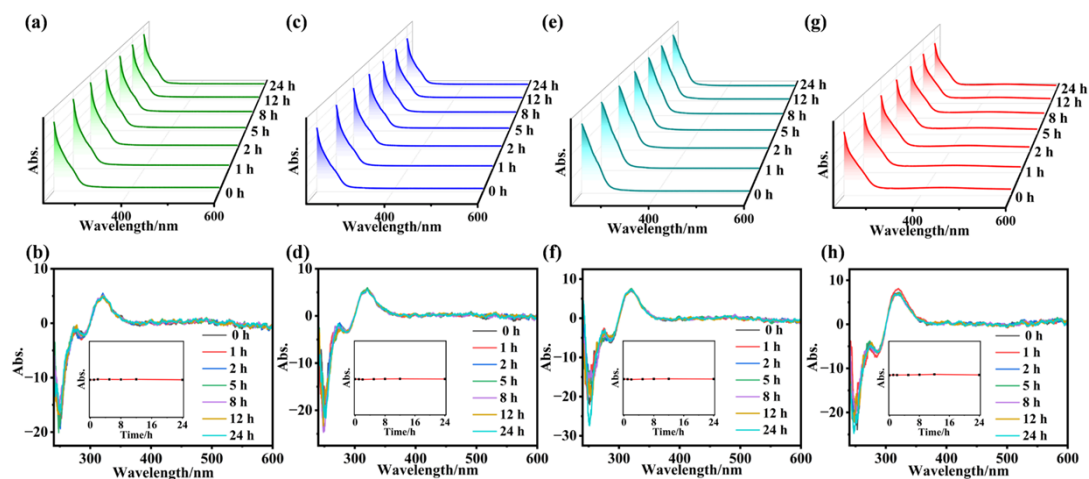

**Fig. S8** Time-dependent UV-vis spectra and CD spectra for the stability test of R-Ag<sub>8</sub> in the acidity (a, b), alkalinity (c, d), oxidation (e, f), and thermal (g, h) conditions (Inset: time-dependent absorption coefficient difference curve at 320 nm).

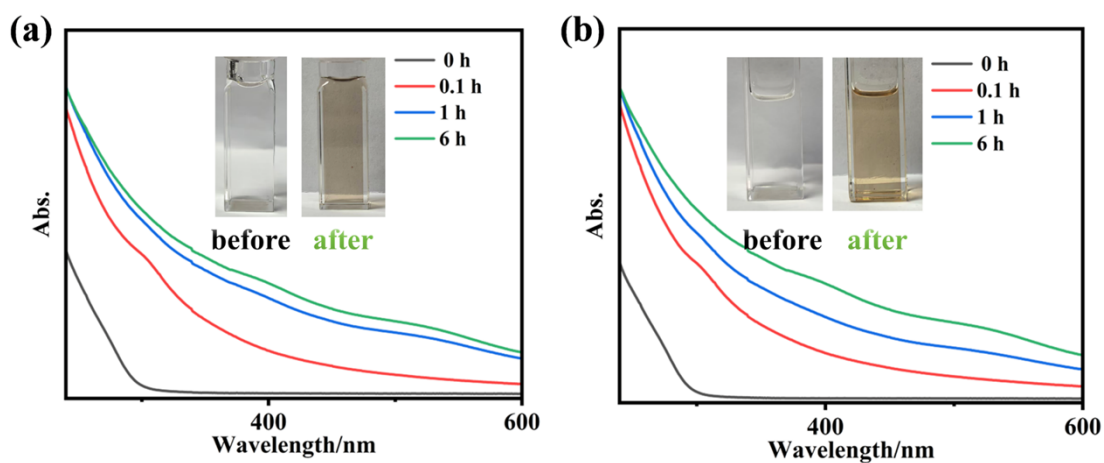

**Fig. S9** Time-dependent UV-vis spectra for the stability test of R-Ag<sub>8</sub> (a) and S-Ag<sub>8</sub> (b) under reducing conditions (inset: the color changes of R/S-Ag<sub>8</sub> before and after the addition of a reducing agent).

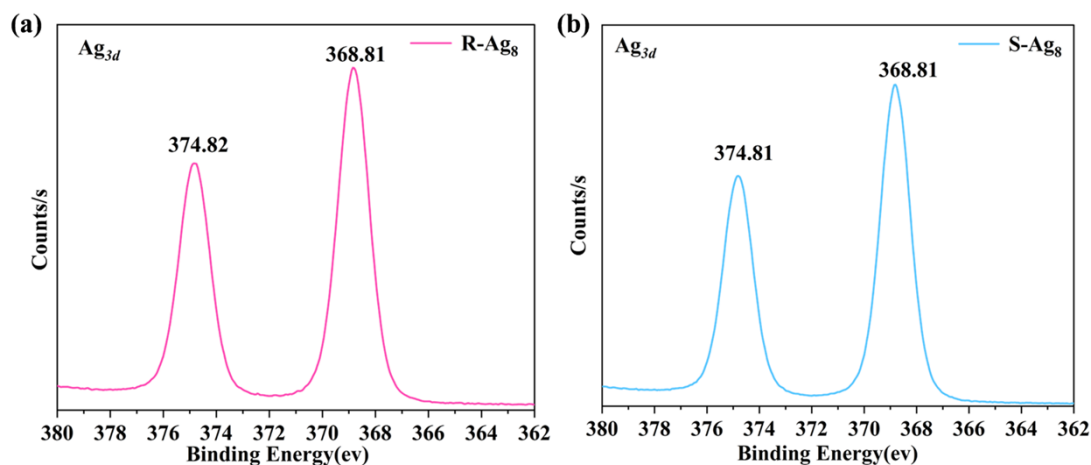

**Fig. S10** XPS spectra of Ag 3d for R/S-Ag<sub>8</sub> clusters.

Table S1 Crystal data and structure refinement for R-Ag<sub>8</sub> and S-Ag<sub>8</sub>

|                                                |                                                                   |                                                                   |
|------------------------------------------------|-------------------------------------------------------------------|-------------------------------------------------------------------|
| CCDC Number                                    | 2511976                                                           | 2511975                                                           |
| Identification code                            | R-Ag <sub>8</sub>                                                 | S-Ag <sub>8</sub>                                                 |
| Empirical formula                              | C <sub>80</sub> H <sub>136</sub> Ag <sub>8</sub> S <sub>8</sub>   | C <sub>80</sub> H <sub>136</sub> Ag <sub>8</sub> S <sub>8</sub>   |
| Formula weight                                 | 2217.32                                                           | 2217.32                                                           |
| Temperature/K                                  | 120.15                                                            | 120.15                                                            |
| Crystal system                                 | monoclinic                                                        | monoclinic                                                        |
| Space group                                    | I2                                                                | I2                                                                |
| a/Å                                            | 16.90380(10)                                                      | 16.9196(2)                                                        |
| b/Å                                            | 12.78060(10)                                                      | 12.7575(2)                                                        |
| c/Å                                            | 20.16090(10)                                                      | 20.1848(3)                                                        |
| $\alpha/^\circ$                                | 90                                                                | 90                                                                |
| $\beta/^\circ$                                 | 91.3310(10)                                                       | 91.2890(10)                                                       |
| $\gamma/^\circ$                                | 90                                                                | 90                                                                |
| Volume/Å <sup>3</sup>                          | 4354.40(5)                                                        | 4355.82(11)                                                       |
| Z                                              | 2                                                                 | 2                                                                 |
| $\rho_{\text{calc}}/\text{cm}^3$               | 1.691                                                             | 1.691                                                             |
| $\mu/\text{mm}^{-1}$                           | 16.197                                                            | 16.192                                                            |
| F(000)                                         | 2240.0                                                            | 2240.0                                                            |
| Crystal size/mm <sup>3</sup>                   | 0.65 × 0.3 × 0.06                                                 | 0.04 × 0.03 × 0.02                                                |
| Radiation                                      | Cu K $\alpha$ ( $\lambda$ = 1.54184)                              | Cu K $\alpha$ ( $\lambda$ = 1.54184)                              |
| 2 $\theta$ range for data collection/ $^\circ$ | 6.904 to 153.84                                                   | 6.742 to 153.4                                                    |
| Index ranges                                   | -21 ≤ h ≤ 21,<br>-13 ≤ k ≤ 15,<br>-25 ≤ l ≤ 24                    | -19 ≤ h ≤ 21,<br>-15 ≤ k ≤ 13,<br>-24 ≤ l ≤ 25                    |
| Reflections collected                          | 42035                                                             | 42202                                                             |
| Independent reflections                        | 8460 [ $R_{\text{int}}$ = 0.0408,<br>$R_{\text{sigma}}$ = 0.0285] | 8370 [ $R_{\text{int}}$ = 0.1316,<br>$R_{\text{sigma}}$ = 0.0663] |
| Data/restraints/parameters                     | 8460/121/445                                                      | 8370/61/444                                                       |
| Goodness-of-fit on F <sup>2</sup>              | 1.086                                                             | 1.062                                                             |
| Final R indexes [ $I \geq 2\sigma(I)$ ]        | $R_1$ = 0.0325,<br>$wR_2$ = 0.0880                                | $R_1$ = 0.0634,<br>$wR_2$ = 0.1684                                |
| Final R indexes [all data]                     | $R_1$ = 0.0328,<br>$wR_2$ = 0.0887                                | $R_1$ = 0.0670,<br>$wR_2$ = 0.1714                                |
| Largest diff.peak/hole / e Å <sup>-3</sup>     | 1.08/-1.08                                                        | 1.97/-1.70                                                        |
| Flack parameter                                | -0.018(6)                                                         | 0.044(18)                                                         |

## Reference

1. F. Neese, *WIREs Computational Molecular Science*, 2012, **2**, 73-78.
2. F. Neese, *WIREs Computational Molecular Science*, 2018, **8**, e1327.
3. S. Grimme, J. Antony, S. Ehrlich and H. Krieg, *J. Chem. Phys.*, 2010, **132**, 154104.
4. S. Grimme, S. Ehrlich and L. Goerigk, *J. Comput. Chem.*, 2011, **32**, 1456-1465.
5. F. Weigend and R. Ahlrichs, *Physical Chemistry Chemical Physics*, 2005, **7**, 3297-3305.
6. C. Adamo and V. Barone, *J. Chem. Phys.*, 1999, **110**, 6158-6170.
7. A. V. Marenich, C. J. Cramer and D. G. Truhlar, *The Journal of Physical Chemistry B*, 2009, **113**, 6378-6396.
8. T. Lu and F. Chen, *J. Comput. Chem.*, 2012, **33**, 580-592.
9. T. Lu, *J. Chem. Phys.*, 2024, **161**, 082503.
